# Supplementary material for: Older Aboriginal Australians’ Health Concerns and Preferences for Healthy Ageing Programs
Source: MDPI journal article supplement (doi:10.3390/ijerph17207390), 2020-10-10
Supplement: s1 [file s1]

**Supplementary Material Table S1: Semi-structured interview questions**

1. What do you see as the main health concerns for older people in your community?
  - 1.1 What do you think your chances are of experiencing any of these?
2. What do you think you do well towards your health?
  - 2.1 What do you think you could do better towards your health?
3. If there was a healthy (brain?) ageing program which was culturally appropriate and relevant to your community, what would it look like?
4. How often do you hear about someone having diabetes, high blood pressure, heart disease or obesity?
  - 4.1 How do these health issues impact on a person and their family's lives?
  - 4.2 What about dementia or memory problems, how often do you hear about someone having dementia or memory problems?
  - 4.3 How does dementia or memory problems impact on families and individuals lives?
  - 4.4 What about depression, how often do you hear about someone having depression?
  - 4.5 How does depression impact on families and individuals lives?
  - 4.6 How does the concern or worry about falls impact on families and individuals lives?

*One of the planned outcomes from this project is to develop a range of health intervention programs. These may include healthy eating, lifestyle and home exercise programs and also brain training using ipad and personal tablet computers.*

5. Would you be interested in participating in a community workshop/focus group where you will be shown some brain and health training programs and asked to share your thoughts about them?
6. If any of the programs were developed, would you be interested in participating?
7. Do you currently participate in any community health programs?
  - 7.1 Which programs are they?
  - 7.2 What is it about these programs that you like/dislike?
  - 7.3 What do you see as the barriers to participating in community health programs?
8. Do you use a smart phone, or another device like an iphone, ipad, tablet or computer?
  - 8.1 Which devices are you familiar with?
9. Is there anything else you would like to add?

**Supplementary Material Table S2: Coding and themes**

**Table 1.** Themes that emerged from regional interviews.

| Core category |                                                                                                                     | Themes |                                                                                                               | Sub-themes |                                                                  |
|---------------|---------------------------------------------------------------------------------------------------------------------|--------|---------------------------------------------------------------------------------------------------------------|------------|------------------------------------------------------------------|
| 1.            | As well as chronic diseases, and fears associated with falls, depression, dementia and anxiety are a constant worry | 1.1    | Shame associated with depression                                                                              | 1.1.1      | Linked to grief and loss                                         |
|               |                                                                                                                     | 1.2    | Mental health issues go underground                                                                           | 1.2.1      | Need to address the effects of suicide                           |
|               |                                                                                                                     |        |                                                                                                               | 1.2.2      | Alcohol and other drugs                                          |
| 2.            | Necessity for Culturally Safe Care                                                                                  | 2.1    | Comfortable with Aboriginal Support Staff                                                                     | 2.1.1      | Cultural Considerations for Healthy Ageing Programs              |
|               |                                                                                                                     | 2.2    | Positive Regard for Aboriginal Medical Service (AMS)                                                          | 2.1.2      | Preference for Elders groups                                     |
| 3.            | Considerable motivation for improving health and wellbeing                                                          | 3.1    | Much support for co-design research project and support for program development <sup>[1]</sup> <sub>SEP</sub> | 3.1.1      | Missed opportunities and knowledge gaps - for example technology |
|               |                                                                                                                     | 3.2    | Health related knowledge gaps                                                                                 |            |                                                                  |

**Table 2.** Themes that emerged from urban interviews.

| Core category |                                                   | Themes |                                             | Sub-themes |                                   |
|---------------|---------------------------------------------------|--------|---------------------------------------------|------------|-----------------------------------|
| 1.            | Healthy ageing priorities                         | 1.1    | Chronic conditions and physical functioning | 1.1.1      | Dementia is a significant concern |
|               |                                                   |        |                                             | 1.2.1      | Loss of independence              |
|               |                                                   |        |                                             | 1.2.2      | Isolation and loneliness          |
|               |                                                   |        |                                             | 1.2.3      | Grief and loss                    |
| 2.            | Attitudes towards Ageing                          | 1.3    | Access to services                          | 1.2.4      | Keeping health problems to selves |
|               |                                                   |        |                                             | 1.1.2      | Inequity                          |
| 3.            | Family and community                              | 2.1    | Hopelessness and despair                    |            |                                   |
|               |                                                   | 2.2    | Motivation                                  |            |                                   |
| 4.            | Barriers and enablers of a healthy ageing program | 3.1    | Carer wellbeing                             | 4.5.1      | Physical activity                 |
|               |                                                   | 3.2    | Community support                           | 4.5.2      | Mentally stimulating activities   |
|               |                                                   | 3.3    | Intergenerational relationships             | 4.5.3      | Social activities                 |
| 5.            | The use of technology                             | 4.1    | Lack of programs                            | 4.5.4      | Health education                  |
|               |                                                   | 4.2    | Wearied                                     |            |                                   |
|               |                                                   | 4.3    | Transport                                   |            |                                   |
|               |                                                   | 4.4    | Aboriginal or culturally responsive staff   |            |                                   |
|               |                                                   | 4.5    | Holistic program                            |            |                                   |
| 5.            | The use of technology                             | 5.1    | Receptivity                                 |            |                                   |
|               |                                                   | 5.2    | Resistance                                  |            |                                   |

**Table 3.** Overall themes from amalgamated data.

| Core category |  | Themes |  | Sub-themes |  |
|---------------|--|--------|--|------------|--|
|---------------|--|--------|--|------------|--|

|       |                                                                             |     |                                         |       |                                           |
|-------|-----------------------------------------------------------------------------|-----|-----------------------------------------|-------|-------------------------------------------|
| 1.    | Perceived health concerns and healthy ageing priorities                     | 1.1 | Physical health                         | 1.1.1 | Chronic disease                           |
|       |                                                                             | 1.2 | Social and emotional wellbeing          | 1.1.2 | Falls and mobility                        |
|       |                                                                             | 1.3 | Access to healthcare services           | 1.1.3 | Dementia                                  |
|       |                                                                             |     |                                         | 1.3.1 | Isolation and loneliness                  |
| 1.3.2 | Grief and loss                                                              |     |                                         |       |                                           |
|       |                                                                             |     |                                         | 1.3.3 | Keeping health problems to selves         |
|       |                                                                             |     |                                         | 1.3.4 | Concern for youth                         |
| 2.    | Barriers and enablers to participation in current healthy ageing programs   | 2.1 | Lack of programs                        | 2.3.1 | Aboriginal-specific program               |
|       |                                                                             | 2.2 | Transport                               | 2.3.2 | Aboriginal or culturally responsive staff |
|       |                                                                             | 2.3 | Culturally safe care                    | 2.3.3 | Culturally safe location                  |
|       |                                                                             | 2.4 | Failure to meet needs and preferences   |       |                                           |
| 3.    | Strategies to activate readiness to adopt healthy ageing programs community | 3.1 | Culturally safe care                    | 3.2.1 | Physical activity                         |
|       |                                                                             | 3.2 | Holistic program                        | 3.2.2 | Mentally stimulating activity             |
|       |                                                                             | 3.3 | Family, community and cultural identity | 3.2.3 | Social activities                         |
|       |                                                                             | 3.4 | Empowerment regarding ageing well       | 3.2.4 | Health education                          |
| 4.    | The use of technology                                                       | 4.1 | Receptivity                             |       |                                           |
|       |                                                                             | 4.2 | Resistance                              |       |                                           |
